# Supplementary material for: Hydrogen production from formic acid decomposition in the liquid phase using Pd nanoparticles supported on CNFs with different surface properties
Source: Royal Society of Chemistry journal article supplement (doi:10.1039/c8se00338f), 2018-01-01
Supplement: c8se00338f1.pdf [file c8se00338f1.pdf]

## SUPPORTING INFORMATION

### Hydrogen production from formic acid decomposition in the liquid phase using Pd nanoparticles supported on CNFs with different surface properties

Felipe Sanchez,<sup>a</sup> Mohammad Hayal Alotaibi,<sup>b</sup> Davide Motta,<sup>a</sup> Carine Edith Chan-Thaw,<sup>c</sup> Andrianelison Rakotomahevitra,<sup>c</sup> Tommaso Tabanelli,<sup>d</sup> Alberto Roldan,<sup>a\*</sup> Ceri Hammond,<sup>a</sup> Qian He,<sup>a</sup> Tom Davies,<sup>a</sup> Alberto Villa<sup>\*e</sup> and Nikolaos Dimitratos<sup>\*a</sup>

<sup>a</sup>Cardiff Catalysis Institute, School of Chemistry, Cardiff University, Main Building, Park Place, Cardiff, CF10 3AT, UK

<sup>b</sup>Joint Center of Excellence in Integrated Nano-Systems, King Abdulaziz City for Science and Technology, P.O. Box 6086 Riyadh 11442 Saudi Arabia

<sup>c</sup>Institut pour la Maîtrise de l'Énergie – Université d'Antananarivo BP 566, 101 Antananarivo, Madagascar

<sup>d</sup>Dipartimento di Chimica Industriale "Toso Montanari", Alma Mater Studiorum Università di Bologna, Viale Risorgimento 4, 40136 Bologna, Italy

<sup>e</sup>Dipartimento di Chimica, Università degli studi di Milano, via Golgi 19, 20133, Milano, Italy

\* corresponding and co-corresponding authors

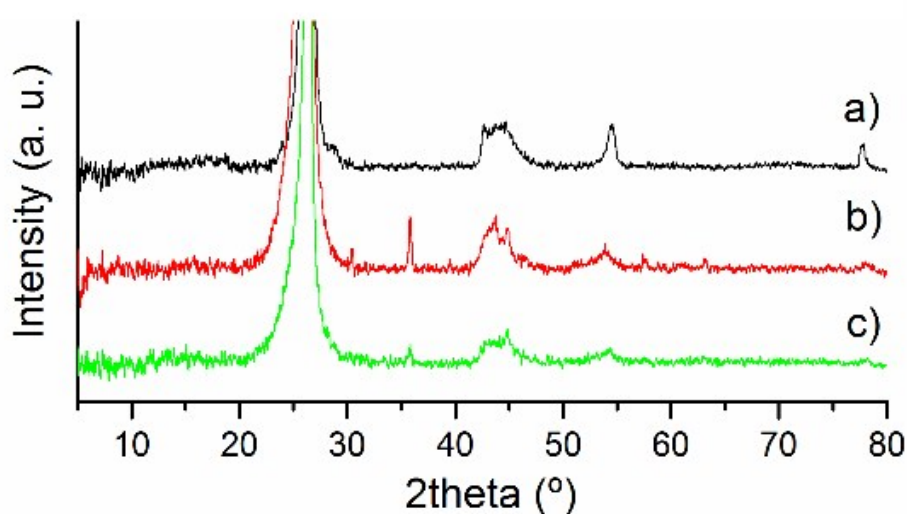

**Figure S1.** XRD patterns of the supports. (a) CNF-HHT, (b) CNF-LHT, (c) CNF-PS.

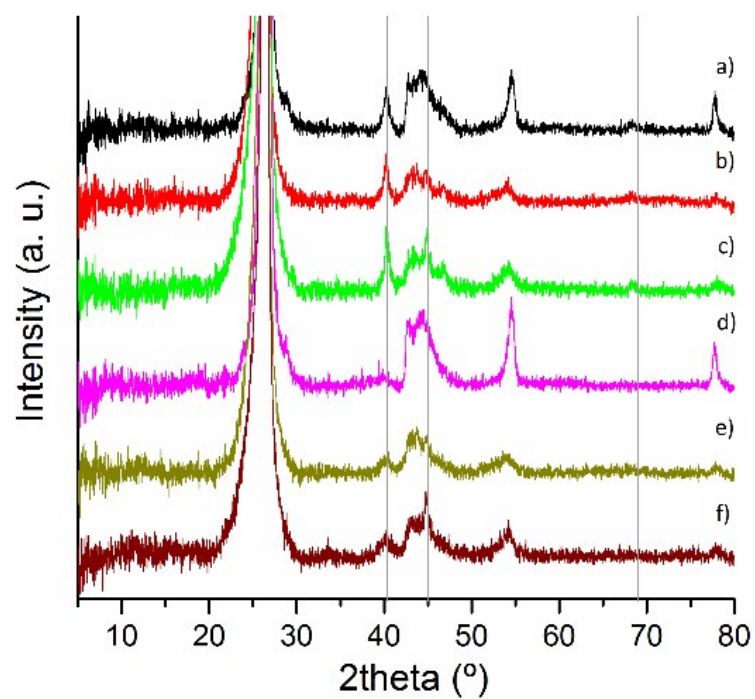

**Figure S2.** XRD patterns of used Pd/CNF (a) Pd<sub>IMP</sub>/CNF-HHT, (b) Pd<sub>IMP</sub>/CNF-LHT, (c) Pd<sub>IMP</sub>/CNF-PS, (d) Pd<sub>SI</sub>/CNF-HHT, (e) Pd<sub>SI</sub>/CNF-LHT, (f) Pd<sub>SI</sub>/CNF-PS.

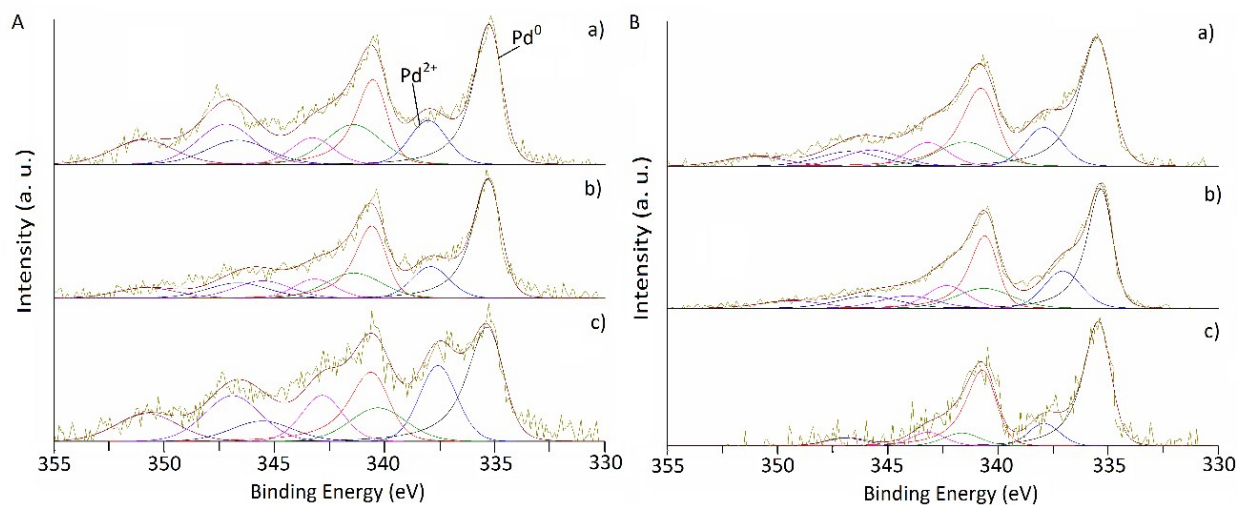

**Figure S3.** XPS spectra of used Pd/CNF (A) Catalyst synthesised by impregnation: (a)  $\text{Pd}_{\text{IMP}}/\text{CNF-HHT}$ , (b)  $\text{Pd}_{\text{IMP}}/\text{CNF-LHT}$ , (c)  $\text{Pd}_{\text{IMP}}/\text{CNF-PS}$ . (B) Catalysts synthesised by sol-immobilisation: (a)  $\text{Pd}_{\text{SI}}/\text{CNF-HHT}$ , (b)  $\text{Pd}_{\text{SI}}/\text{CNF-LHT}$ , (c)  $\text{Pd}_{\text{SI}}/\text{CNF-PS}$ .

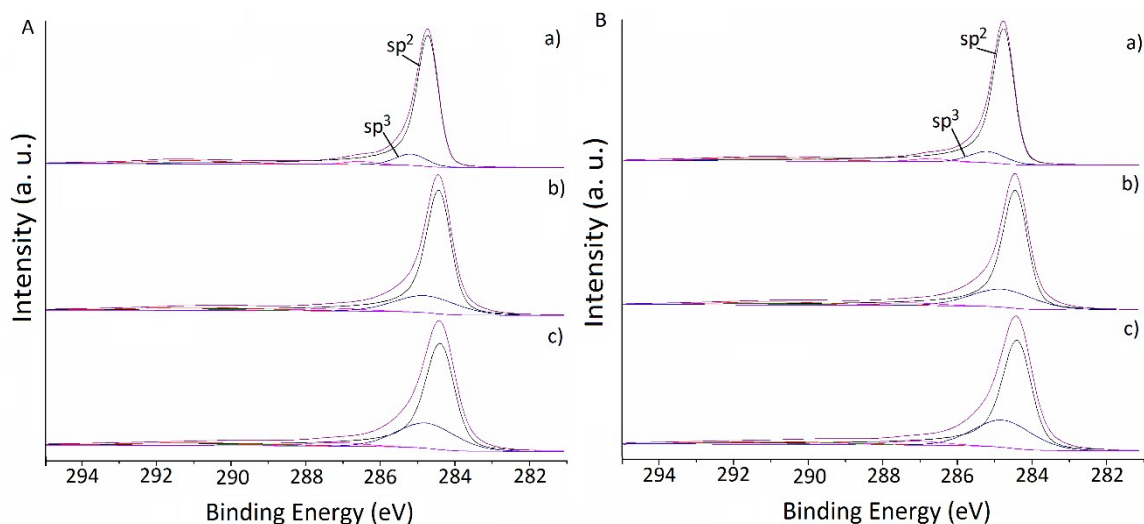

**Figure S4.** XPS spectra of fresh Pd/CNF in the binding energy region of 281–295 eV corresponding to C1s. (A) Catalyst synthesised by impregnation: (a)  $\text{Pd}_{\text{IMP}}/\text{CNF-HHT}$ , (b)  $\text{Pd}_{\text{IMP}}/\text{CNF-LHT}$ , (c)  $\text{Pd}_{\text{IMP}}/\text{CNF-PS}$ . (B) Catalysts synthesised by sol-immobilisation: (a)  $\text{Pd}_{\text{SI}}/\text{CNF-HHT}$ , (b)  $\text{Pd}_{\text{SI}}/\text{CNF-LHT}$ , (c)  $\text{Pd}_{\text{SI}}/\text{CNF-PS}$ .

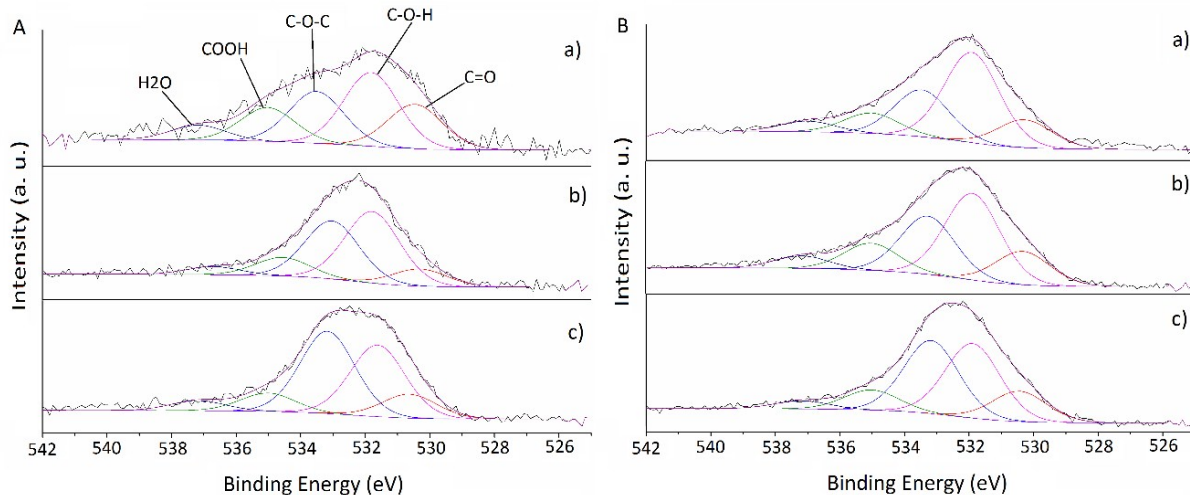

**Figure S5.** XPS spectra of fresh Pd/CNF in the binding energy region of 525-542 eV corresponding to O1s. (A) Catalyst synthesised by impregnation: (a) Pd<sub>IMP</sub>/CNF-HHT, (b) Pd<sub>IMP</sub>/CNF-LHT, (c) Pd<sub>IMP</sub>/CNF-PS. (B) Catalysts synthesised by sol-immobilisation: (a) Pd<sub>SI</sub>/CNF-HHT, (b) Pd<sub>SI</sub>/CNF-LHT, (c) Pd<sub>SI</sub>/CNF-PS.

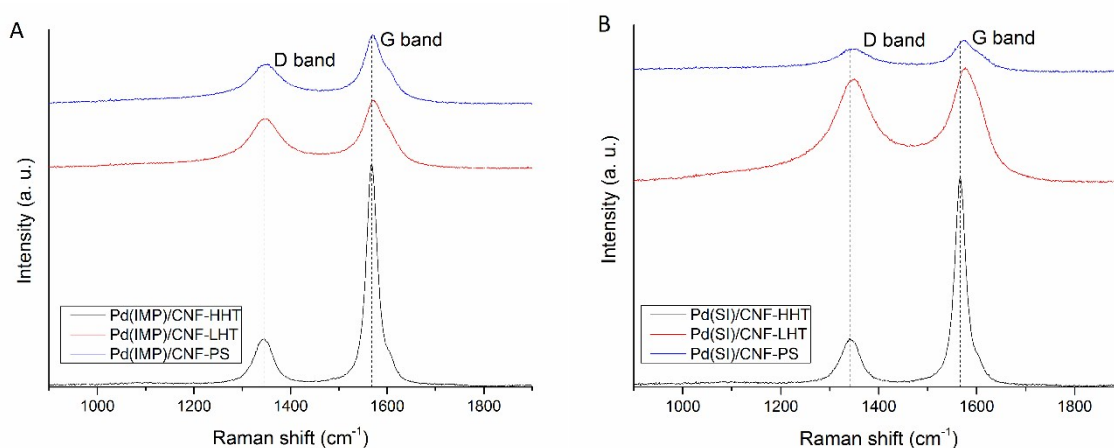

**Figure S6.** Raman spectra of the used samples. (A) Catalyst synthesised by impregnation: (a) Pd<sub>IMP</sub>/CNF-HHT (black curve), (b) Pd<sub>IMP</sub>/CNF-LHT (red curve), (c) Pd<sub>IMP</sub>/CNF-PS (blue curve). (B) Catalysts synthesised by sol-immobilisation: (a) Pd<sub>SI</sub>/CNF-HHT (black curve), (b) Pd<sub>SI</sub>/CNF-LHT (red curve), (c) Pd<sub>SI</sub>/CNF-PS (blue curve).

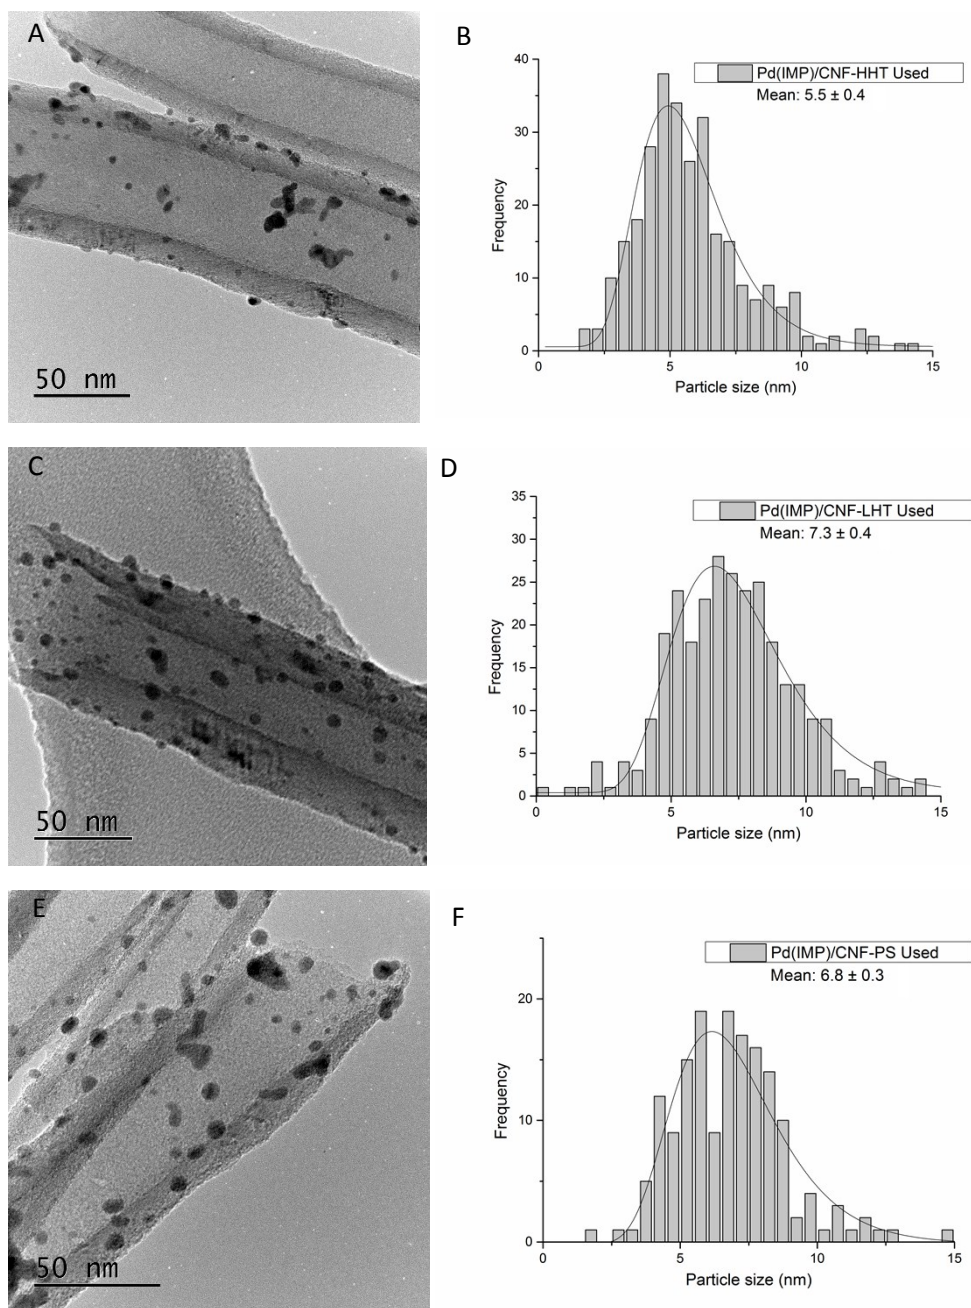

**Figure S7.** Bright field TEM micrographs and corresponding histograms of the particle size distributions for the used catalysts prepared by impregnation. (A,B) Pd<sub>IMP</sub>/CNF-HHT, (C,D) Pd<sub>IMP</sub>/CNF-LHT, (E,F) Pd<sub>IMP</sub>/CNF-PS.



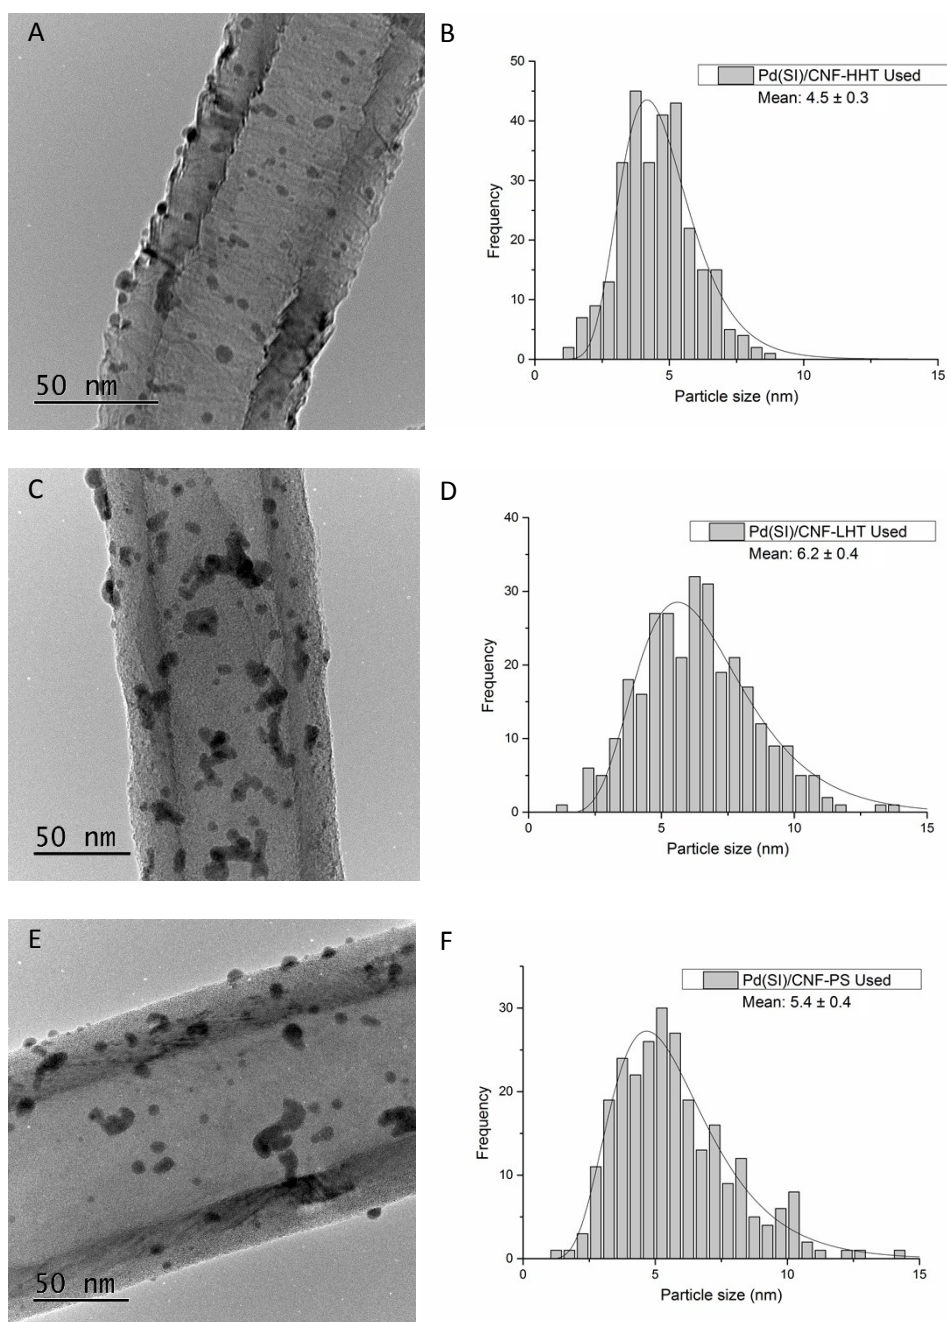

**Figure S8.** Bright field TEM micrographs and corresponding histograms of the particle size distributions for the used catalysts prepared by sol-immobilisation. (A,B) Pd<sub>SI</sub>/CNF-HHT, (C,D) Pd<sub>SI</sub>/CNF-LHT, (E,F) Pd<sub>SI</sub>/CNF-PS.

| Catalyst                   | Temp (°C) | H <sub>2</sub> (%) | CO <sub>2</sub> (%) | CO (ppm) | CO/CO <sub>2</sub> |
|----------------------------|-----------|--------------------|---------------------|----------|--------------------|
| Pd <sub>IMP</sub> /CNF-HHT | 30        | 6.3                | 5.7                 | 14.7     | 0.000258           |
| Pd <sub>SI</sub> /CNF-HHT  | 30        | 5.9                | 6.3                 | 11.0     | 0.000175           |

**Table S1.** Concentrations of H<sub>2</sub>, CO<sub>2</sub> and CO evolved at 30 °C and ratio CO/CO<sub>2</sub>.
